# Supplementary material for: Chloroquine exacerbates serum withdrawal-induced G1 phase arrest via an autophagy-independent mechanism
Source: Royal Society of Chemistry journal article supplement (doi:10.1039/c7ra06737b), 2017-01-01
Supplement: c7ra06737b1.pdf [file c7ra06737b1.pdf]

## Electronic Supplementary Information

### Chloroquine exacerbates serum withdrawal-induced G<sub>1</sub> phase arrest via an autophagy-independent mechanism

Lei Gao,<sup>a</sup> Hongming Zhu,<sup>ab</sup> Huimin Fan<sup>\*ab</sup> and Zhongmin Liu<sup>\*ab</sup>

<sup>a</sup>Research Institute of Heart Failure, Shanghai East Hospital, Tongji University School of Medicine, Shanghai, China. Email: liu.zhongmin@tongji.edu.cn; frankfan@tongji.edu.cn; zhm@tongji.edu.cn

<sup>b</sup>Translational Medical Center for Stem Cell Therapy & Institute for Regenerative Medicine, Shanghai East Hospital, Tongji University School of Medicine, Shanghai, China

Hongming Zhu, Huimin Fan, and Zhongmin Liu contributed equally to this work.

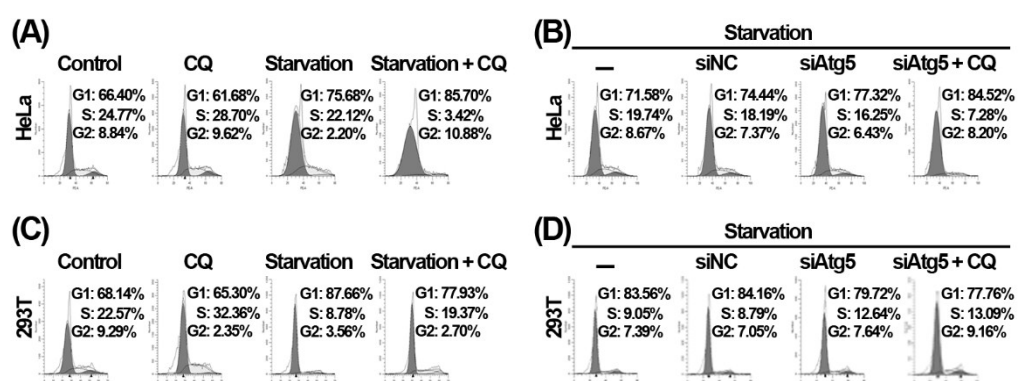

**Fig. S1** The effect of CQ and Atg5 knockdown on G<sub>1</sub> phase arrest induced by serum withdrawal in HeLa and 293T cell lines. (A) Cell cycle distribution analysis. HeLa cells were subjected to normal culture medium or serum-deprived medium for 24 h, in the absence or presence of 20  $\mu$ M CQ. (B) Cell cycle distribution analysis. After transfection with siNC or siAtg5, HeLa cells were exposed to serum-deprived medium for 24 h, in the absence or presence of CQ. (C) Cell cycle distribution analysis. 293T cells were subjected to normal culture medium or serum-deprived medium for 24 h, in the absence or presence of 20  $\mu$ M CQ. (D) Cell cycle distribution analysis. After transfection with siNC or siAtg5, 293T cells were exposed to serum-deprived medium for 24 h, in the absence or presence of CQ. Flow cytometry was used to analysis cell cycle distribution.
